# Supplementary material for: Methylation of elongation factor 1A by yeast Efm4 or human eEF1A-KMT2 involves a beta-hairpin recognition motif and crosstalks with phosphorylation
Source: PubMed Central journal article supplement (PMC10844748; doi:10.1016/j.jbc.2024.105639), 2024-01-08
Supplement: mmc1.pdf [file mmc1.pdf]

## **Methylation of elongation factor 1A by yeast Efm4 or human eEF1A-KMT2 involves a beta-hairpin recognition motif and crosstalks with phosphorylation**

Joshua J. Hamey<sup>1\*</sup>, Amy Nguyen<sup>1</sup>, Mahdi Haddad<sup>1</sup>, Xabier Vázquez-Campos<sup>1</sup>, Paige G. Pfeiffer<sup>1</sup>, Marc R. Wilkins<sup>1</sup>

<sup>1</sup>School of Biotechnology and Biomolecular Sciences, University of New South Wales, NSW, Australia

\*Corresponding author: Dr. Joshua J. Hamey, [j.hamey@unsw.edu.au](mailto:j.hamey@unsw.edu.au)

### **Supporting information**

**Figure S1.** AlphaFold-Multimer models of the Efm4:eEF1A complex.

**Figure S2.** Efm4 and eEF1A from rank 1 AlphaFold-Multimer model show expected folded domains.

**Figure S3.** The EFM4 gene begins at the currently annotated M29 position, chrIX:242,027.

**Figure S4.** Deletion of incorrectly annotated upstream region of Efm4 does not affect its activity *in vitro*.

**Figure S5.** eEF1A K316 methylation generated during the DSSO crosslinking reaction.

**Figure S6.** MS/MS spectra identifying DSSO crosslinks between Efm4 and eEF1A.

**Figure S7.** Coomassie-stained SDS-PAGE gel of Efm4 time series assay.

**Figure S8.** Coomassie-stained SDS-PAGE gel of Efm4 mutant assays.

**Figure S9.** Genomic mutations of EFM4 do not substantially affect its expression.

**Figure S10.** Coomassie-stained SDS-PAGE gel of Efm4 assays with WT and F163A eEF1B $\alpha$ .

**Figure S11.** AlphaFold-Multimer models of eEF1A-KMT-201 bound to eEF1A1.

**Figure S12.** AlphaFold-Multimer models of eEF1A-KMT-201 bound to eEF1A2.

**Figure S13.** AlphaFold-Multimer models of eEF1A-KMT-207 bound to eEF1A1.

**Figure S14.** AlphaFold-Multimer models of eEF1A-KMT-207 bound to eEF1A2.

**Figure S15.** Public mRNA-seq, Ribo-seq and proteomic data indicate that eEF1A-KMT2-207 is the predominantly expressed isoform.

**Figure S16.** Comparison of MS/MS spectra confirm identity of eEF1A-KMT2-207-specific peptides in cell lines.

**Figure S17.** Almost all residues unique to eEF1A2 are not at the interface with eEF1A-KMT2.

**Figure S18.** Mouse eEF1A-KMT2 is more similar to human eEF1A-KMT2-207 than eEF1A-KMT2-201.

**Figure S19.** Human eEF1A1 and eEF1A2 purified from WT yeast are methylated at K318.

**Figure S20.** Coomassie-stained SDS-PAGE gel of eEF1A-KMT2-201 and eEF1A-KMT2-207 methylation assays of eEF1A1 and eEF1A2.

**Figure S21.** Coomassie-stained SDS-PAGE gels of eEF1A-KMT2-207 F218A and F220A mutant assays.

**Figure S22.** Coomassie-stained SDS-PAGE gels of eEF1A phospho-mutant assays.

**Figure S23.** PentaHis immunoblot confirms phospho-mutants have no effect on eEF1A protein levels.

**Figure S24.** Phosphorylated eEF1A S314 likely causes steric clashes with Efm4 L149 and N184.

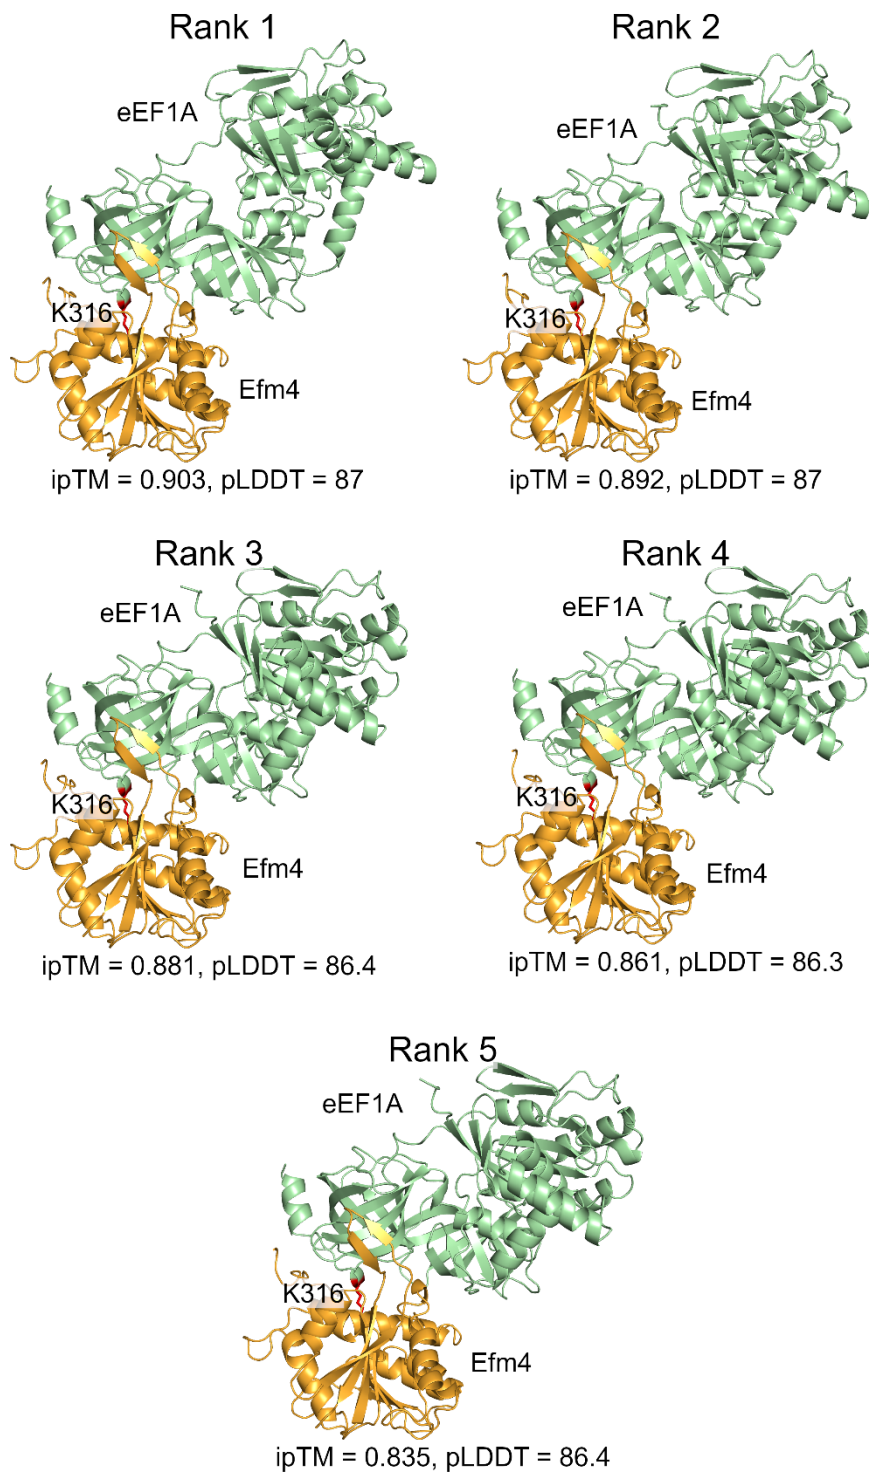

**Figure S1. AlphaFold-Multimer models of the Efm4:eEF1A complex.**

AlphaFold-Multimer models of Efm4 bound to eEF1A were generated as described in methods. The main variation between models is the conformational flexibility of domain 1 relative to domains 2 and 3.

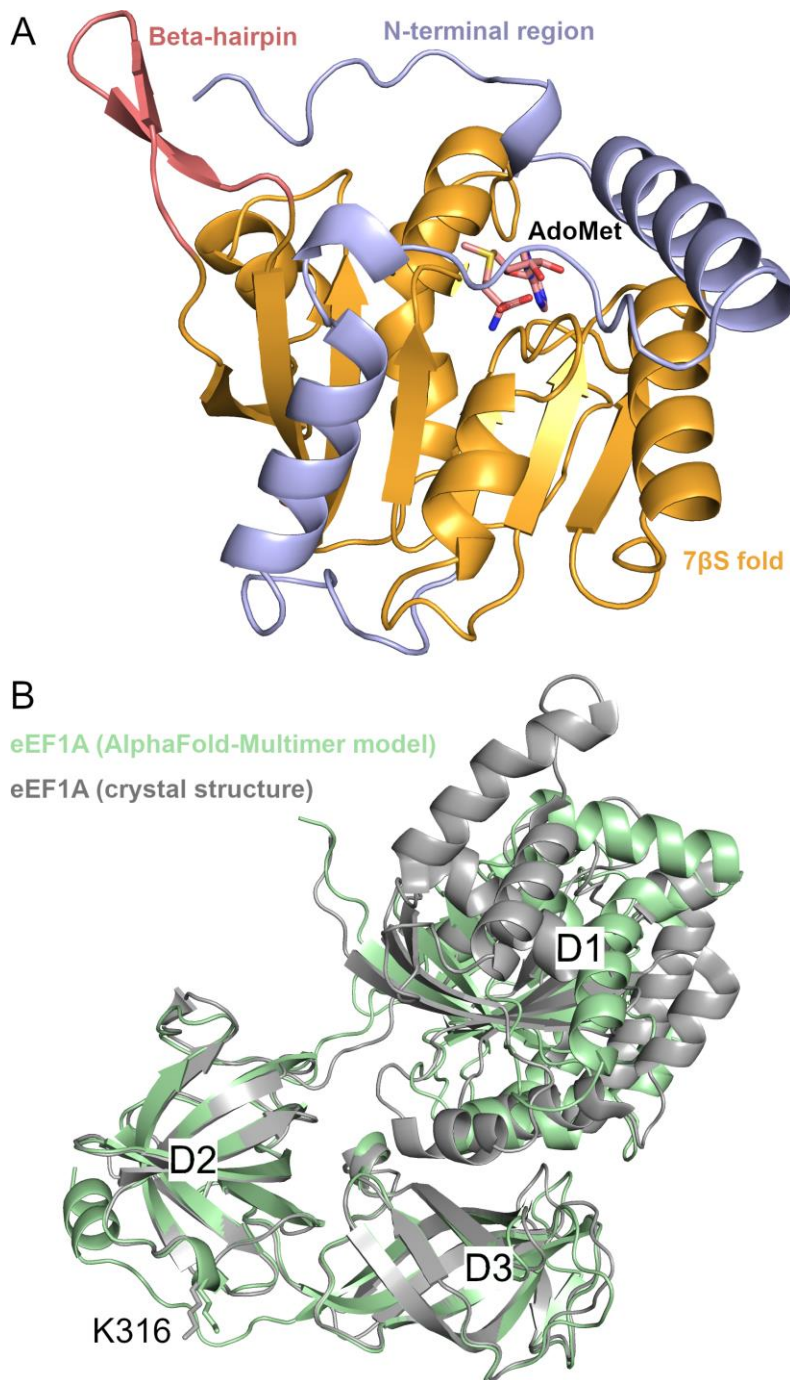

**Figure S2. Efm4 and eEF1A from rank 1 AlphaFold-Multimer model show expected folded domains.**

A) Efm4 from rank 1 model of Efm4:eEF1A showing the expected 7 $\beta$ S methyltransferase fold (orange), with a short beta-hairpin interrupting the 7 $\beta$ S fold between  $\beta$ 6 and  $\beta$ 7, as well as an N-terminal region with two additional  $\alpha$ -helices. Note that this N-terminal region is different (and after in sequence) from the untranslated upstream region (which is not shown).

B) eEF1A from rank 1 model of Efm4:eEF1A aligned with a crystal structure of eEF1A (PDB ID: 1F60). Structures were aligned using domains eEF1A 2 and 3 (RMSD = 0.514 Å). Conformational flexibility of domain 1 (D1) is the only substantial difference between the two structures, with lysine 316 on domain 2 (D2) in an identical position in both structures.

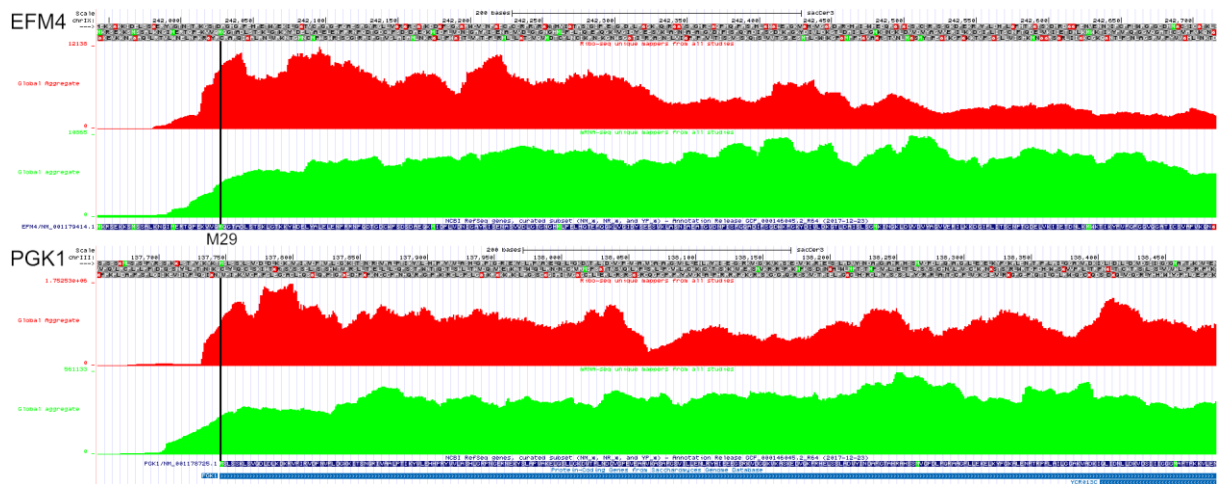

**Figure S3. The EFM4 gene begins at the currently annotated M29 position, chrIX:242,027.**

Screenshot from the GWIPs-viz browser shows public ribosome footprint profiling (ribo-seq, red) and mRNA-seq (green) data for EFM4 and a reference gene, PGK1. The currently annotated M29 appears to be the true start codon for EFM4. This would place EFM4 at genomic co-ordinates chrIX:242,027 – 242,716 instead of chrIX:241,943 – 242,716.

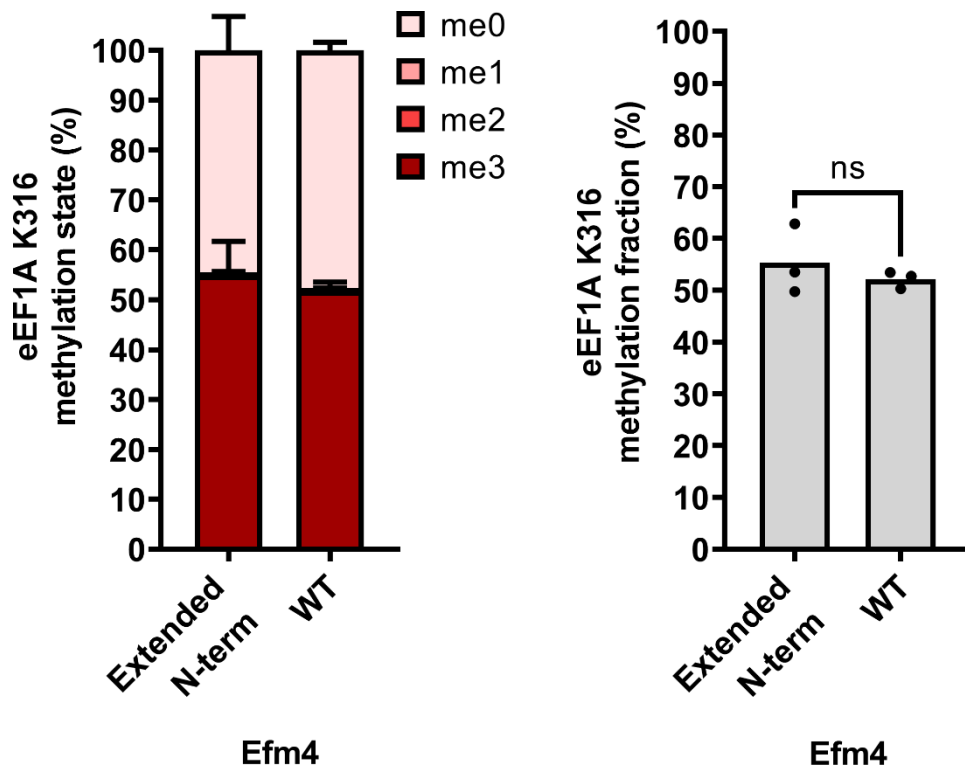

**Figure S4. Deletion of incorrectly annotated upstream region of Efm4 does not affect its activity *in vitro*.**

Purified “Extended N-term” Efm4 (containing the upstream sequence MKRSEKKSMSALKNIGIMERTQPEKVVQ) or WT Efm4 with this upstream sequence removed (starting MQGTADLSTS...) (both at 3.5  $\mu$ M) were incubated with eEF1A purified from  $\Delta$ EFM4 yeast (3  $\mu$ M) at 30  $^{\circ}$ C for 3 h. The resulting eEF1A K316 methylation was detected by LC-MS/MS and quantification of tryptic peptide NVSVKEIR (K316 underlined) in its doubly-charged state. Left: Relative levels of eEF1A K316 methylation states. Error bars show one standard deviation. Right: eEF1A K316 methylation fraction relative to 100% trimethylated K316. A two-tailed t-test without equal variance was carried out between the methylation fractions from WT and “Extended N-term” Efm4 (ns: not significant).

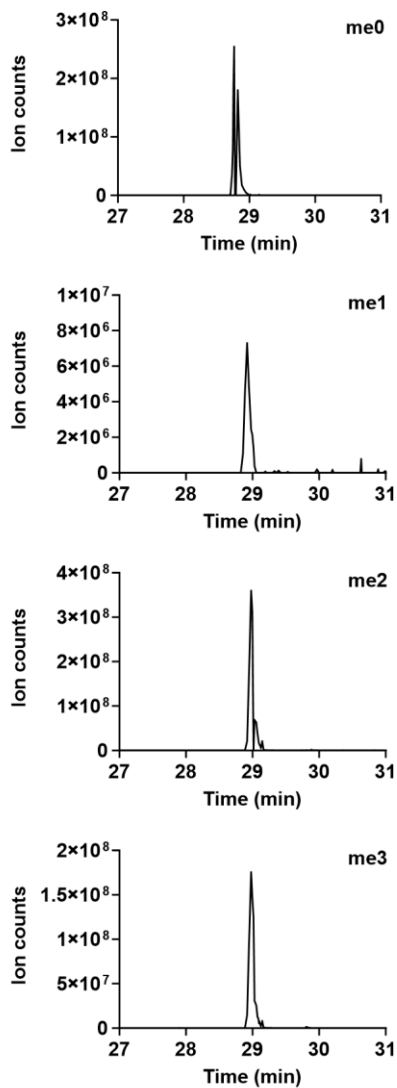

**Figure S5. eEF1A K316 methylation generated during the DSSO crosslinking reaction.**

Extracted ion chromatograms are shown for the triply-charged form of the eEF1A K316-containing GluC peptide QGVPGDNVGFNVKNVSVKE (K316 underlined) in its un-, mono-, di- and tri-methylated states (me0, me1, me2, me3).





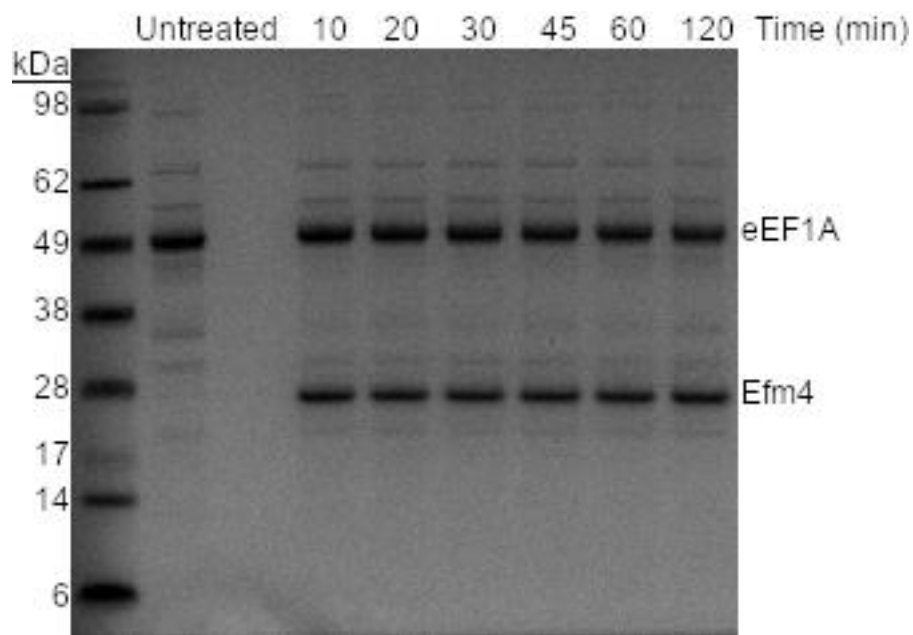

**Figure S7. Coomassie-stained SDS-PAGE gel of Efm4 time series assay.**

Purified WT Efm4 (3  $\mu$ M) was incubated with eEF1A (from  $\Delta$ EFM4) (2  $\mu$ M) in the presence of AdoMet at 30  $^{\circ}$ C, for the indicated times. Proteins were then separated by SDS-PAGE and stained with Coomassie. eEF1A gel bands were then digested with AspN and the resulting eEF1A K316 methylation was detected by LC-MS/MS (see Fig. 2A).

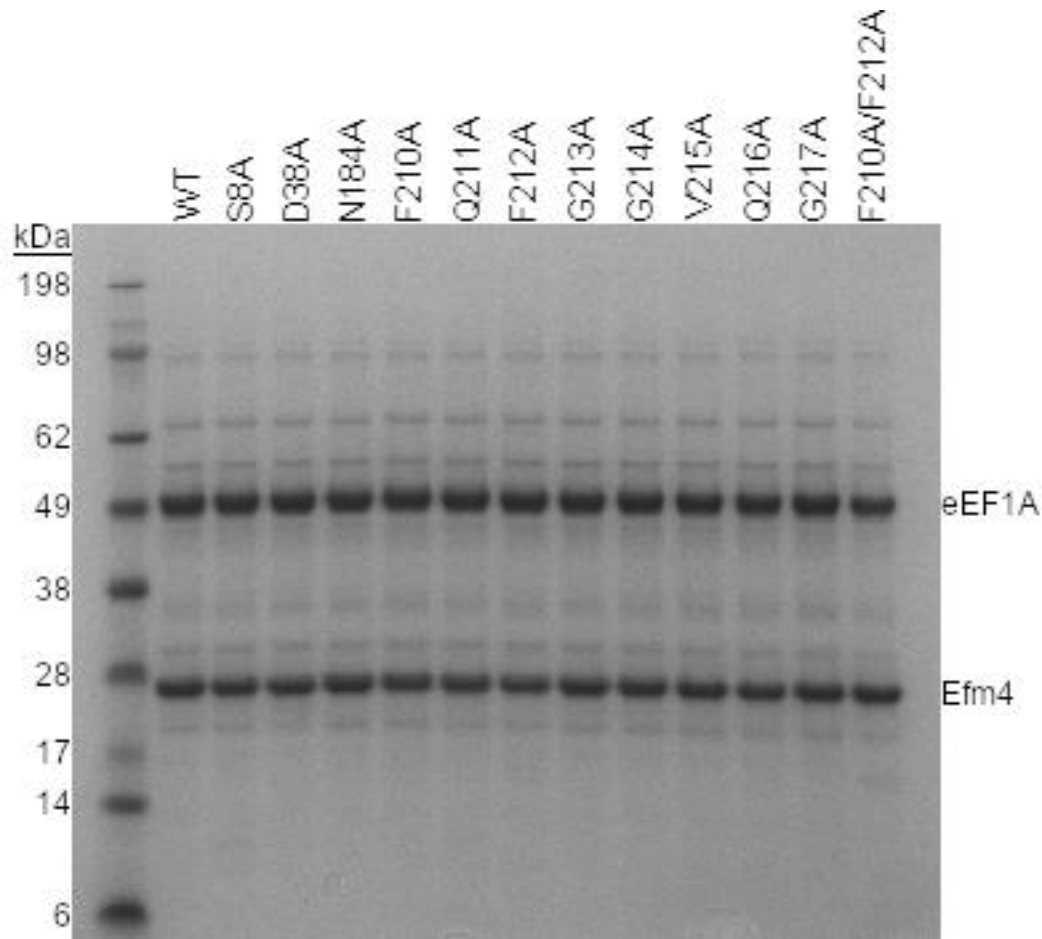

**Figure S8. Coomassie-stained SDS-PAGE gel of Efm4 mutant assays.**

Purified WT or mutant Efm4 (3  $\mu$ M) were incubated with eEF1A (from  $\Delta$ EFM4) (2  $\mu$ M) in the presence of AdoMet for 30 min at 30  $^{\circ}$ C. Assays were carried out in triplicate; shown here is a representative replicate. Proteins were separated by SDS-PAGE and stained with Coomassie. eEF1A gel bands were then digested by AspN and the resulting eEF1A K316 methylation was detected by LC-MS/MS (see Fig. 3C).

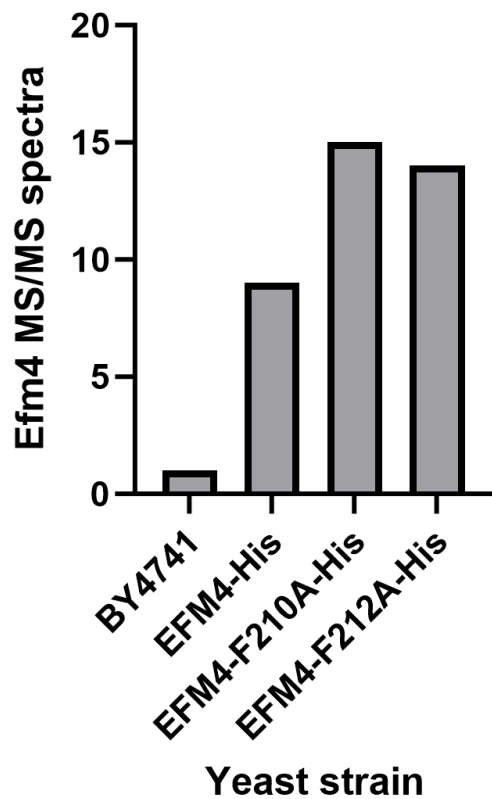

**Figure S9. Genomic mutations of EFM4 do not substantially affect its expression.**

Efm4 was enriched from strains BY4741, EFM4-His, EFM4-F210A-His and EFM4-F212A-His using His Mag Separose Ni resin. Eluates were separated by SDS-PAGE, the region of the gel corresponding to the size of Efm4 was excised and resulting gel bands were digested with trypsin and analysed by LC-MS/MS. Shown are the resulting number of MS/MS spectra matching to Efm4.

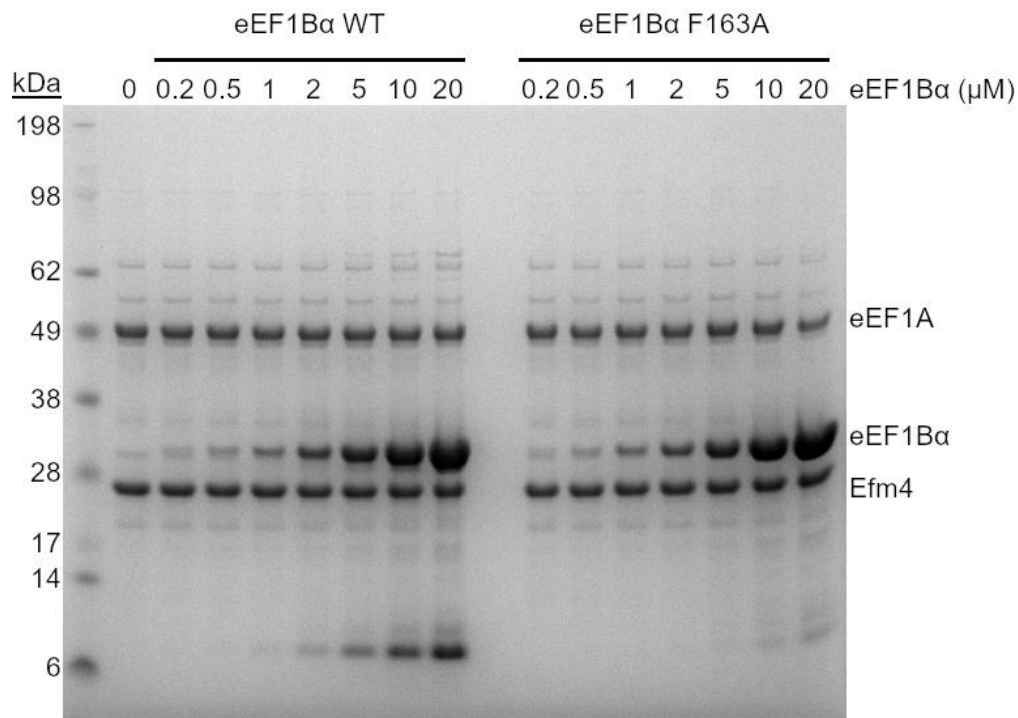

**Figure S10. Coomassie-stained SDS-PAGE gel of Efm4 assays with WT and F163A eEF1B $\alpha$ .**

Purified WT Efm4 (3  $\mu$ M) was incubated with eEF1A (from  $\Delta$ EFM4) (2  $\mu$ M) in the presence of varying concentrations of either wild-type or F163A eEF1B $\alpha$  and with AdoMet for 30 min at 30  $^{\circ}$ C. Assays were carried out in triplicate; shown here is a representative replicate. Proteins were separated by SDS-PAGE and stained with Coomassie. eEF1A gel bands were then digested by AspN and the resulting eEF1A K316 methylation was detected by LC-MS/MS (see Fig. 4B).

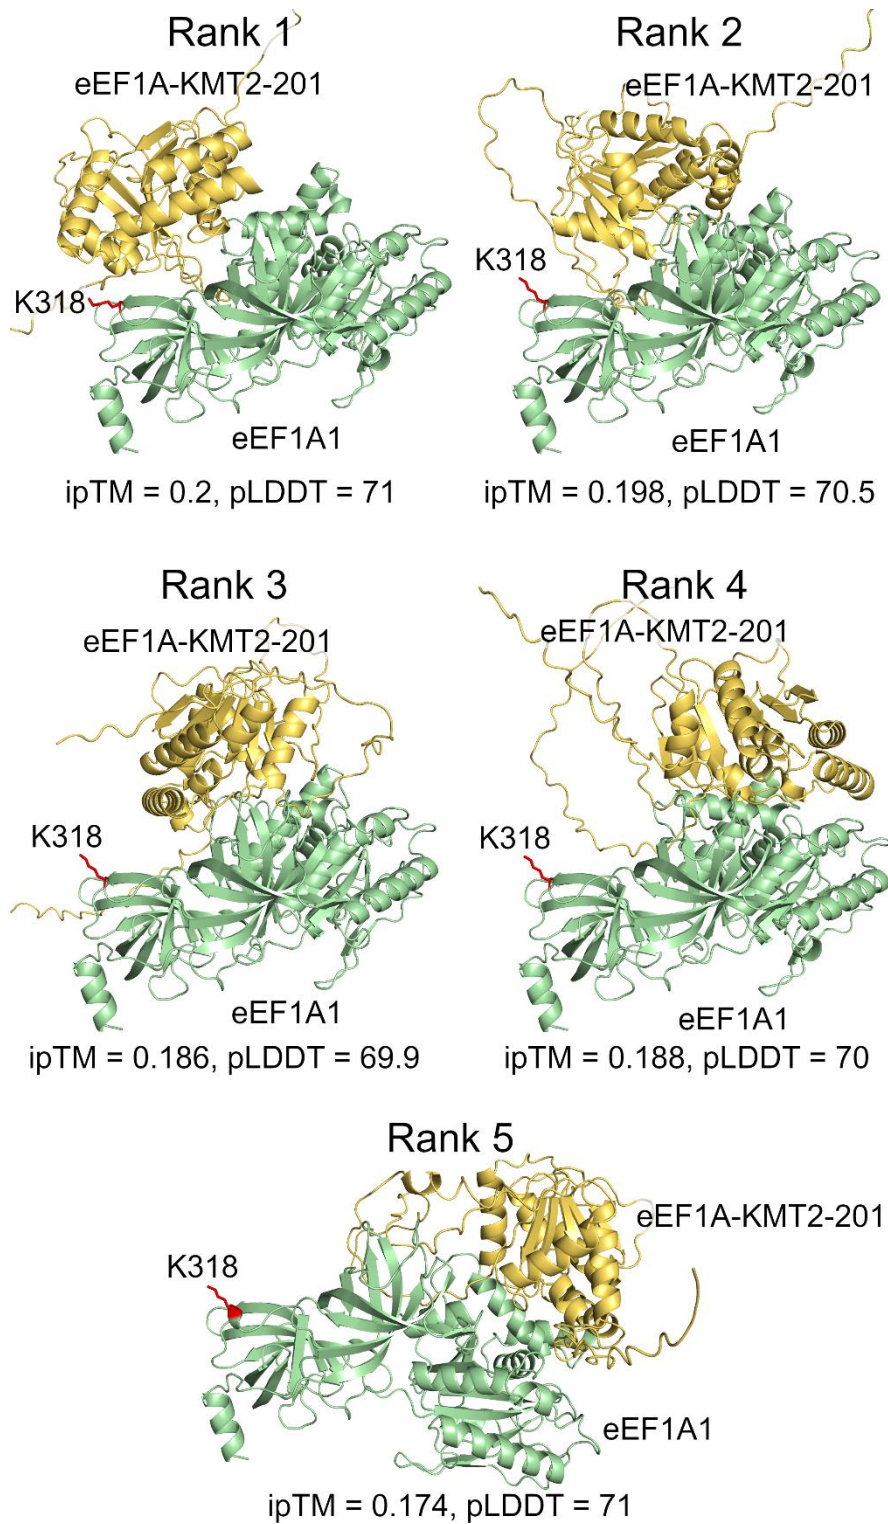

**Figure S11. AlphaFold-Multimer models of eEF1A-KMT2-201 bound to eEF1A1.**

AlphaFold-Multimer models of eEF1A-KMT2-201 bound to eEF1A1 were generated as described in methods. eEF1A1 K318 is not bound at the active site of eEF1A-KMT2, as would be expected.

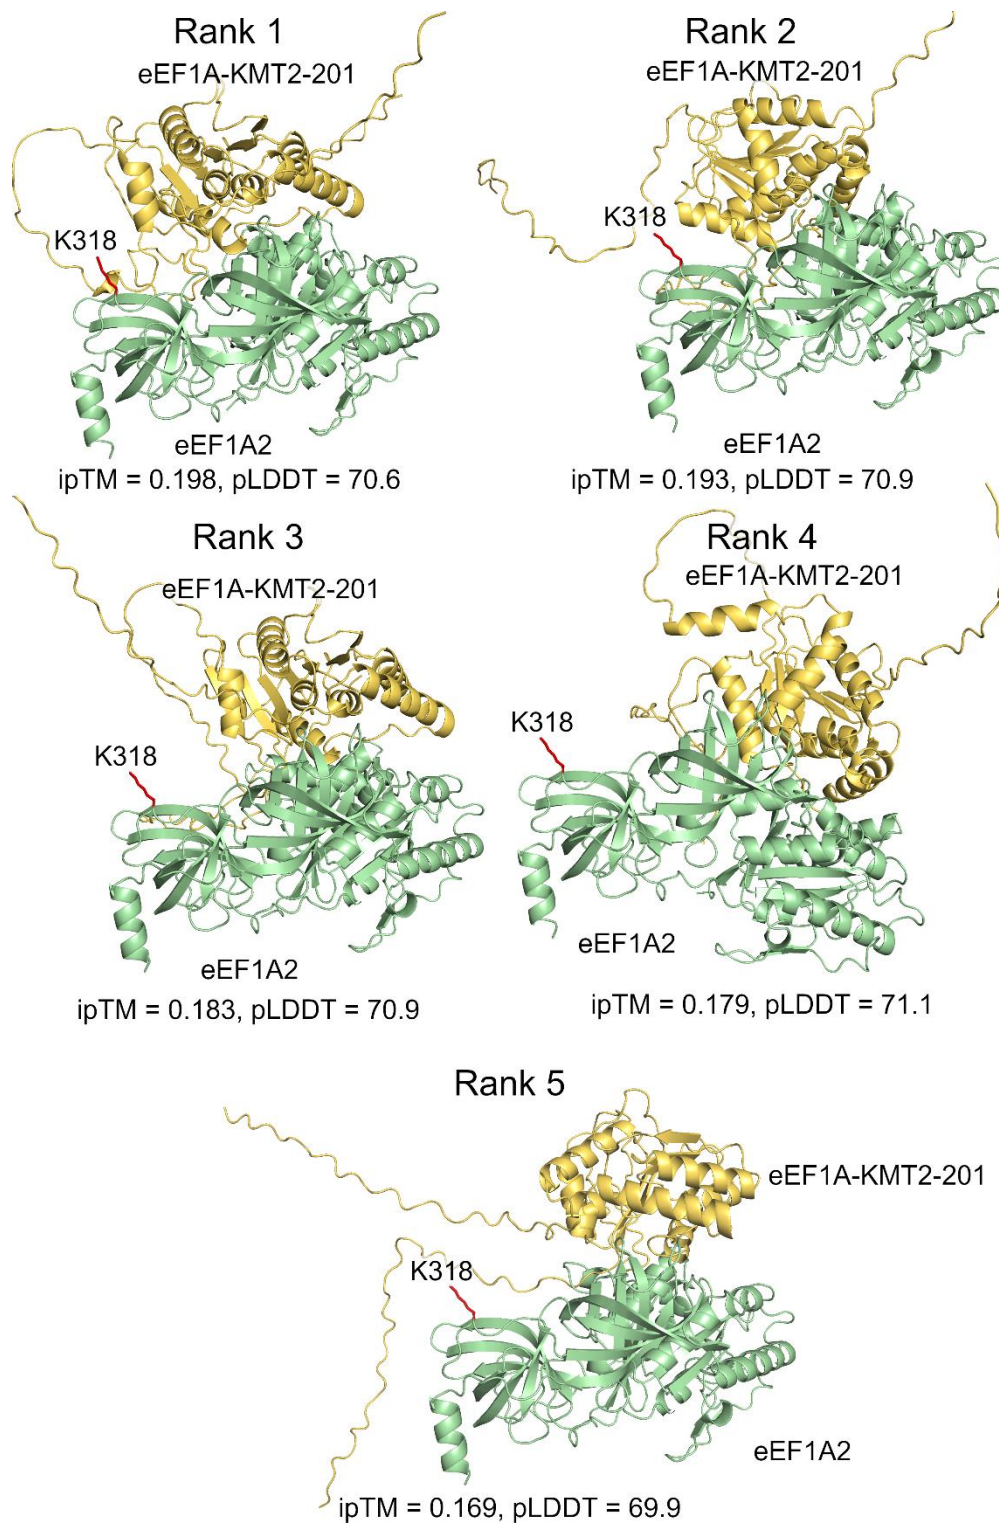

**Figure S12. AlphaFold-Multimer models of eEF1A-KMT-201 bound to eEF1A2.**

AlphaFold-Multimer models of eEF1A-KMT2-201 bound to eEF1A2 were generated as described in methods. eEF1A2 K318 is not bound at the active site of eEF1A-KMT2, as would be expected.



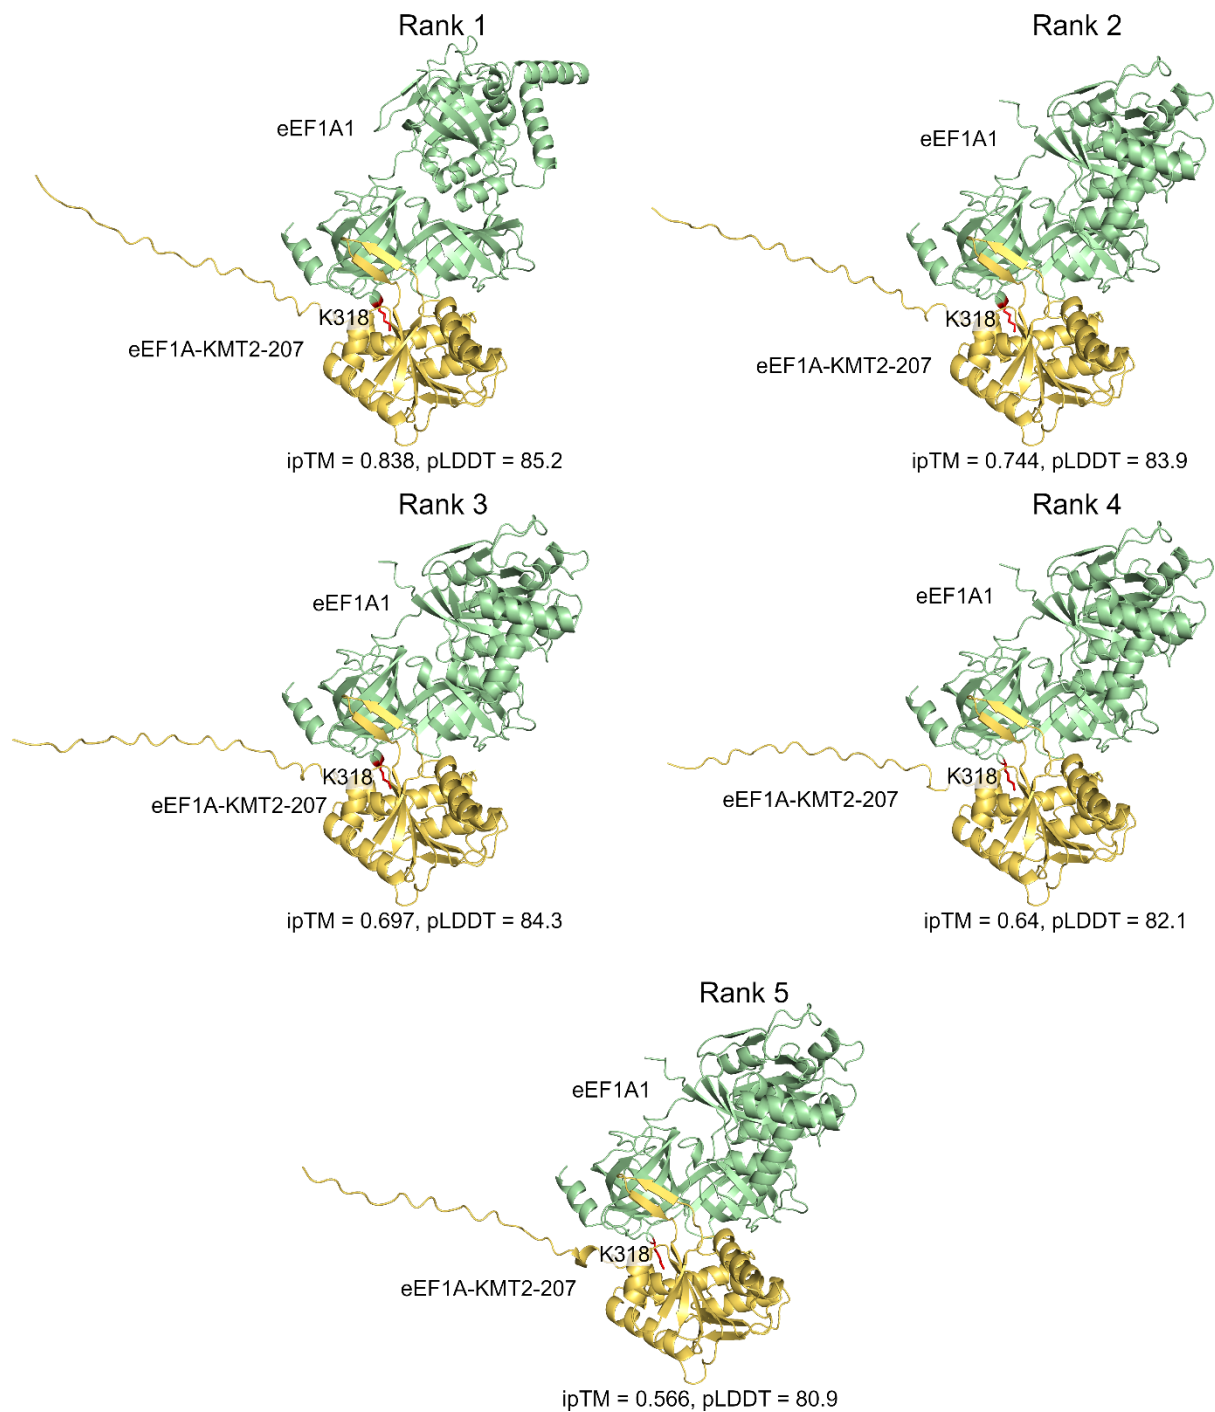

**Figure S13. AlphaFold-Multimer models of eEF1A-KMT2-207 bound to eEF1A1.**

AlphaFold-Multimer models of eEF1A-KMT2-207 bound to eEF1A1 were generated as described in methods. eEF1A1 K318 is bound at the active site of eEF1A-KMT2. The N-terminal 26 residues of eEF1A-KMT2-207 are likely to be unstructured, with pLDDT scores <50.

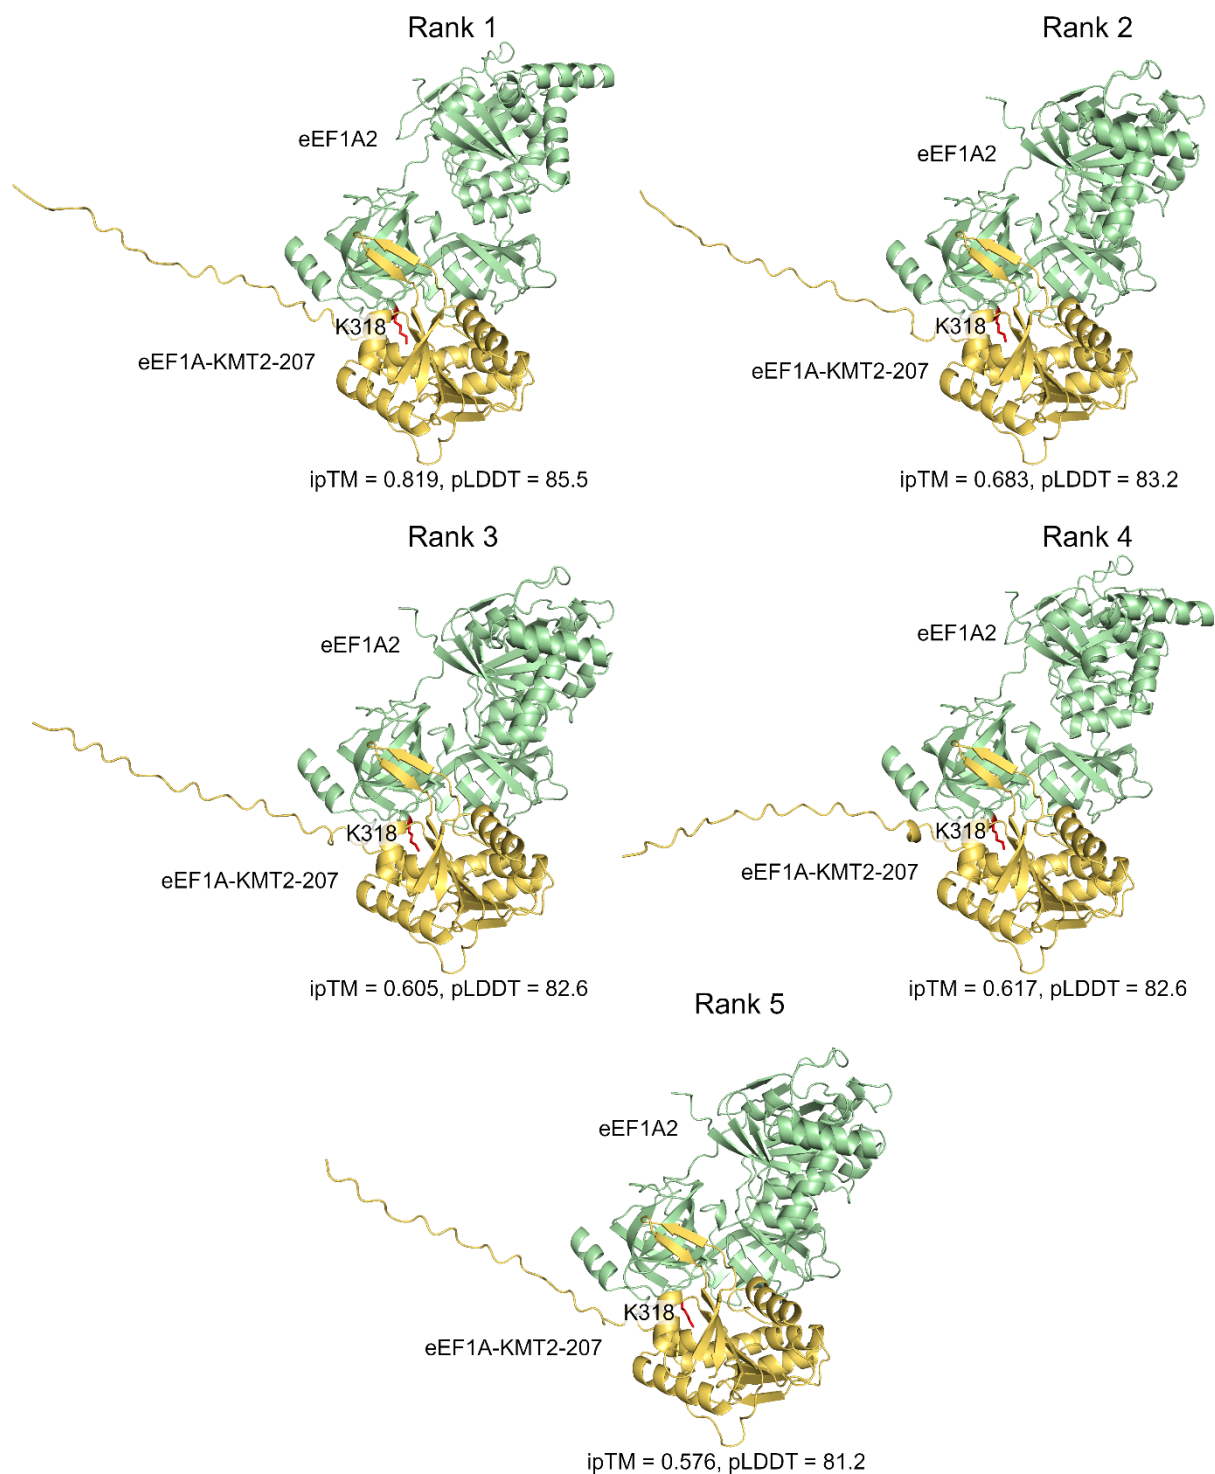

**Figure S14. AlphaFold-Multimer models of eEF1A-KMT2-207 bound to eEF1A2.**

AlphaFold-Multimer models of eEF1A-KMT2-207 bound to eEF1A2 were generated as described in methods. eEF1A2 K318 is bound at the active site of eEF1A-KMT2. The N-terminal 26 residues of eEF1A-KMT2-207 are likely to be unstructured, with pLDDT scores <50.



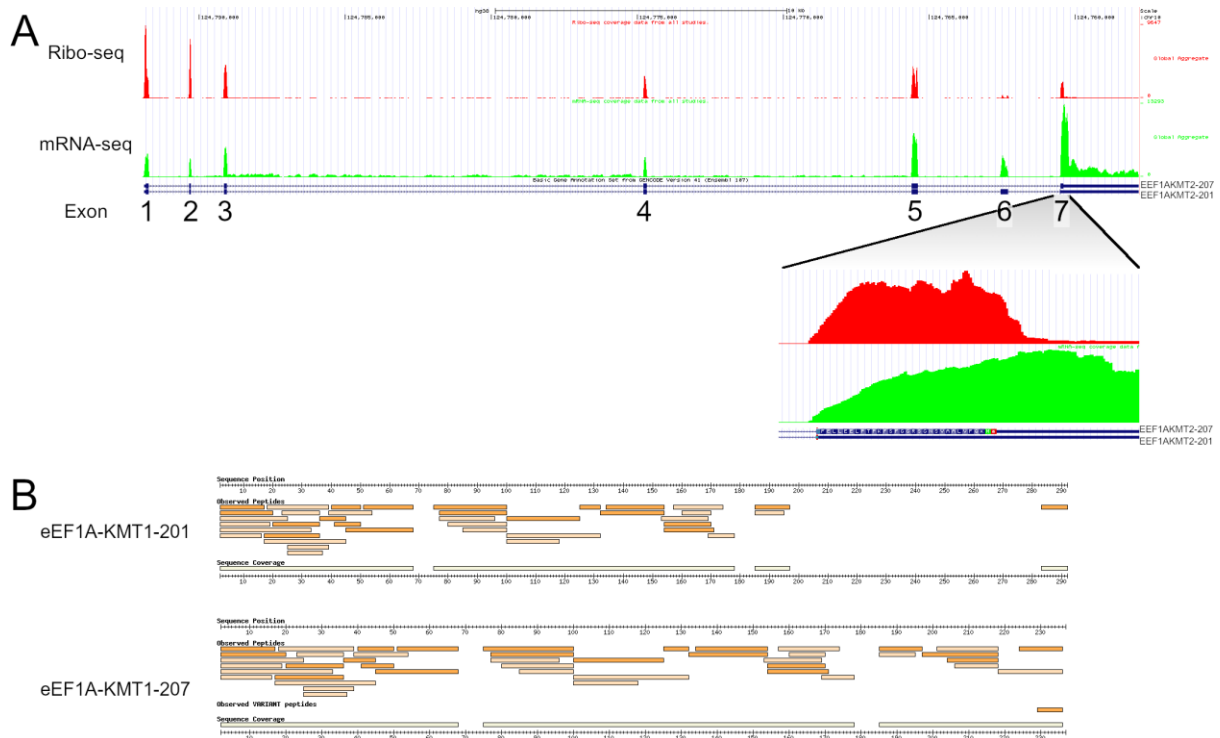

**Figure S15. Public mRNA-seq, Ribo-seq and proteomic data indicate that eEF1A-KMT2-207 is the predominantly expressed isoform.**

A) Aggregate mRNA-seq and Ribo-seq data for eEF1A-KMT2 isoforms from GWIPS-viz Genome Browser. Exon 6 is substantially less translated than all other exons, including exon 7, indicating that eEF1A-KMT2-207 is translated more than eEF1A-KMT2-201. B) Proteomic evidence for eEF1A-KMT2-201 and eEF1A-KMT2-207 from PeptideAtlas, showing higher sequence coverage for eEF1A-KMT2-207.

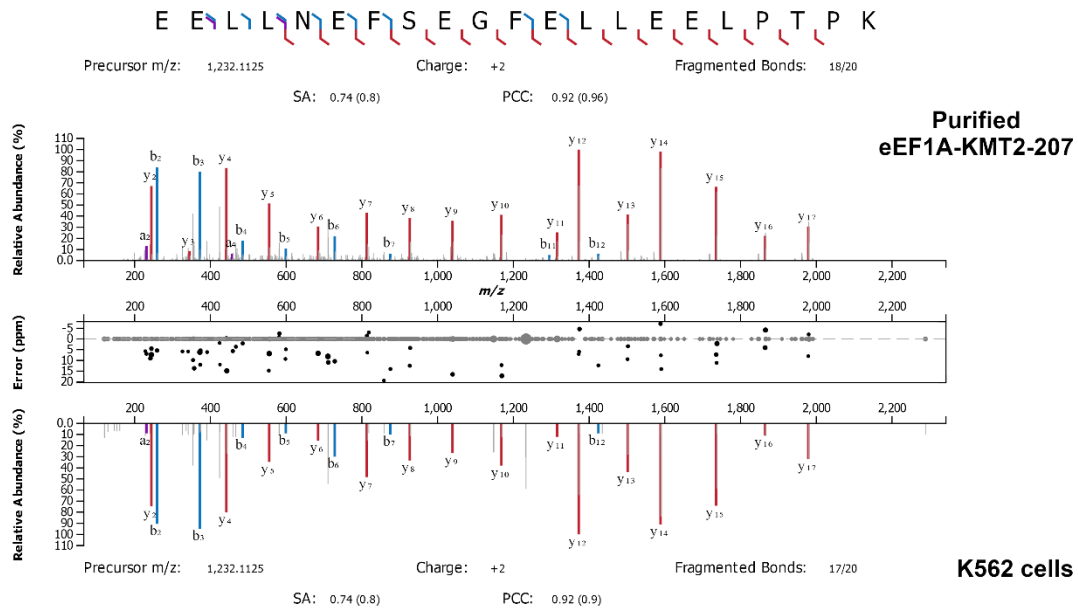

E E L L N E F S E G F E L L E E L P T P K

USI: mzspect:PXD005141:20151123\_QEp1\_LC7\_NiKu\_SA\_K562\_Trypsin-bRP02:scan:88296:EELLNEFSEGFELLEELPTPK/2

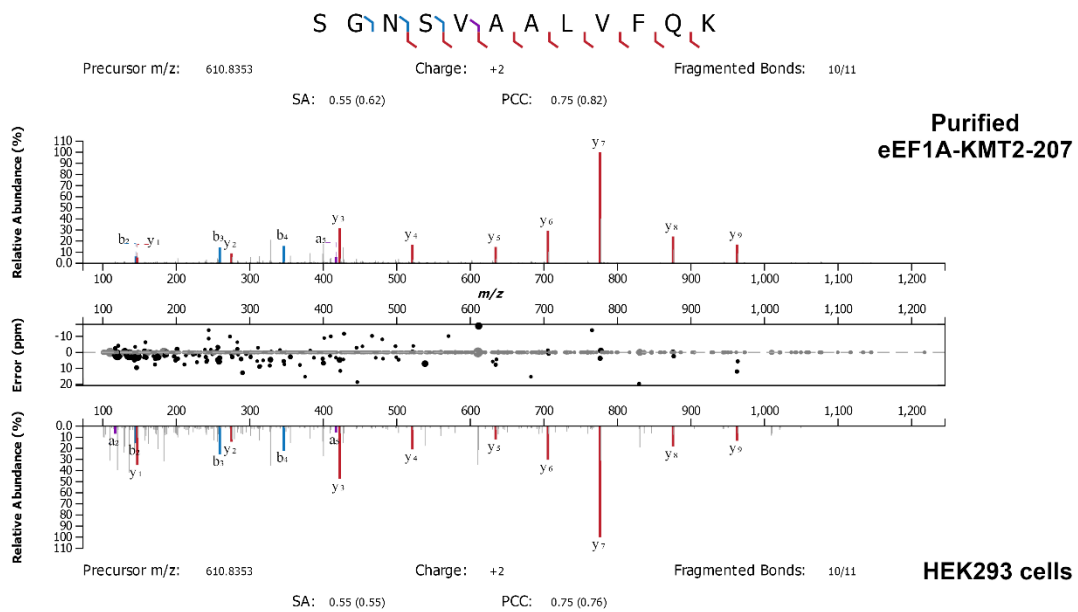

S G N S V A A L V F Q K

USI: mzspect:PXD005141:20151123\_QEp1\_LC7\_NiKu\_SA\_Hek293\_Trypsin-bRP07:scan:51314:SGNSVAALVFQK/2

**Figure S16. Comparison of MS/MS spectra confirm identity of eEF1A-KMT2-207-specific peptides in cell lines.**

Comparison of MS/MS spectra generated from purified eEF1A-KMT2-207 and from public proteomic datasets, confirming the identity of two eEF1A-KMT2-207-specific peptides. Spectra were graphed and compared using the Universal Spectrum Explorer, with the following settings: fragment ions: a, b, y, fragment ion charge states: 1+, 2+; fragment annotation tolerance: 20 ppm; annotation intensity threshold: 5% base peak.

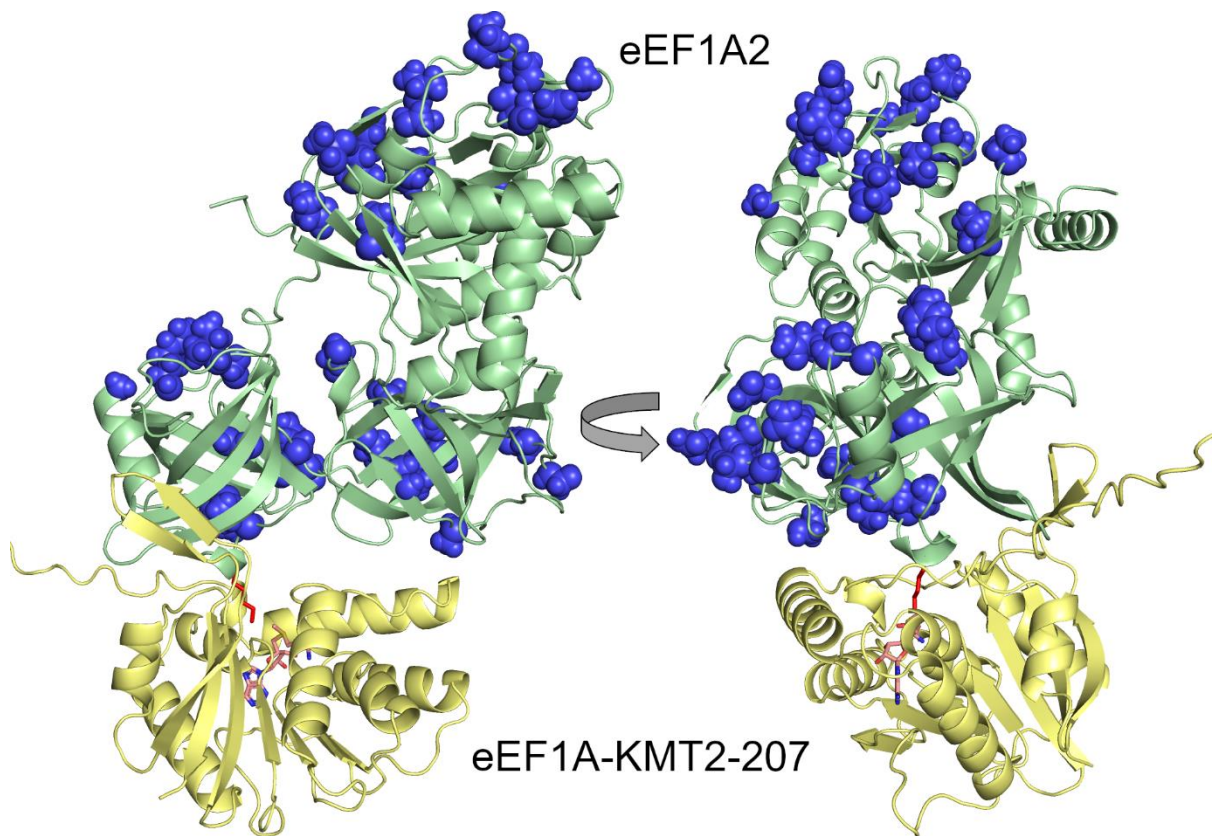

**Figure S17. Almost all residues unique to eEF1A2 are not at the interface with eEF1A-KMT2.**

Top-ranked AlphaFold-Multimer model of eEF1A-KMT2-207:eEF1A2 complex (shown as cartoon), with the residues differing between eEF1A2 and eEF1A1 shown as blue spheres.

```

Human eEF1A-KMT2-201 1  MSSGADGGGGA AVAARS DKGSPGEDGFVPSALGTRHWDVAVYERELQTFREYGDGTGEIWFGEESMNRLIRWMQKHKIPLD 80
Mouse eEF1A-KMT2 1  MNADAEGHSGAVVPAQSPEGSSAADDFVPSALGTRHWDVAVYERELRTFQEYGDGTGEIWFGEESMNRLIRWMQKHKIPLD 80

Human eEF1A-KMT2-201 81  ASVLDIGTGNQVFLVELAKFGFSNITGIDYSPSAIQLSGSIIEKEGLSNIKLVKVEDFLNLSTQLSGFHICIDKGTFDAIS 160
Mouse eEF1A-KMT2 81  ASVLDIGTGNQVFLVELVKGHGSNITGIDYSPSAIKLSASILEKEGLSNINLVKVEDFLNPSTKLSGFHVCVDKGTYDAIS 160
                                     207
Human eEF1A-KMT2-201 161  LNPDNAIEKRKQYVKLSRVLKVGKFFLITSCNWK EELLNEFSEGWSTVAGFWLTAALTSWAQAIIFS---TSASRVGGT 237
Mouse eEF1A-KMT2 161  LNPDNAIEKRKQYVMSLSRVLKVGKFFLITSCNWKAEELDAFSEGF-----ELFEELPTPKFSFGGR 223

Human eEF1A-KMT2-201 238  TGTTHHAWIIFVFLAETRFCHVVQAGLELLGSSDSPTWPPKVLGLYHARPSLAF 291
Mouse eEF1A-KMT2 224  SGNVVAALVF-----QKRGTSLDKIS----- 244

Human eEF1A-KMT2-207 1  MSSGADGGGGA AVAARS DKGSPGEDGFVPSALGTRHWDVAVYERELQTFREYGDGTGEIWFGEESMNRLIRWMQKHKIPLD 80
Mouse eEF1A-KMT2 1  MNADAEGHSGAVVPAQSPEGSSAADDFVPSALGTRHWDVAVYERELRTFQEYGDGTGEIWFGEESMNRLIRWMQKHKIPLD 80

Human eEF1A-KMT2-207 81  ASVLDIGTGNQVFLVELAKFGFSNITGIDYSPSAIQLSGSIIEKEGLSNIKLVKVEDFLNLSTQLSGFHICIDKGTFDAIS 160
Mouse eEF1A-KMT2 81  ASVLDIGTGNQVFLVELVKGHGSNITGIDYSPSAIKLSASILEKEGLSNINLVKVEDFLNPSTKLSGFHVCVDKGTYDAIS 160
                                     207
Human eEF1A-KMT2-207 161  LNPDNAIEKRKQYVKLSRVLKVGKFFLITSCNWK EELLNEFSEGFELLEELPTPKFSFGGRSGNSVAALVFQKM---- 236
Mouse eEF1A-KMT2 161  LNPDNAIEKRKQYVMSLSRVLKVGKFFLITSCNWKAEELDAFSEGFELLEELPTPKFSFGGRSGNTVAALVFQKRGTSL 240

Human eEF1A-KMT2-207  ----
Mouse eEF1A-KMT2 241  DKIS 244

```

**Figure S18. Mouse eEF1A-KMT2 is more similar to human eEF1A-KMT2-207 than eEF1A-KMT2-201.**

Alignments of mouse eEF1A-KMT2 (UniProt ID Q9D853) with human eEF1A-KMT2-201 (UniProt ID Q5JPI9) or human eEF1A-KMT2-207 (UniProt ID A0A494BZY7) were generated using COBALT (NBCI). Identical residues are red, different residues are blue and gaps are grey. Residue 207, after which eEF1A-KMT2-201 and eEF1A-KMT2-207 diverge in sequence, is indicated.

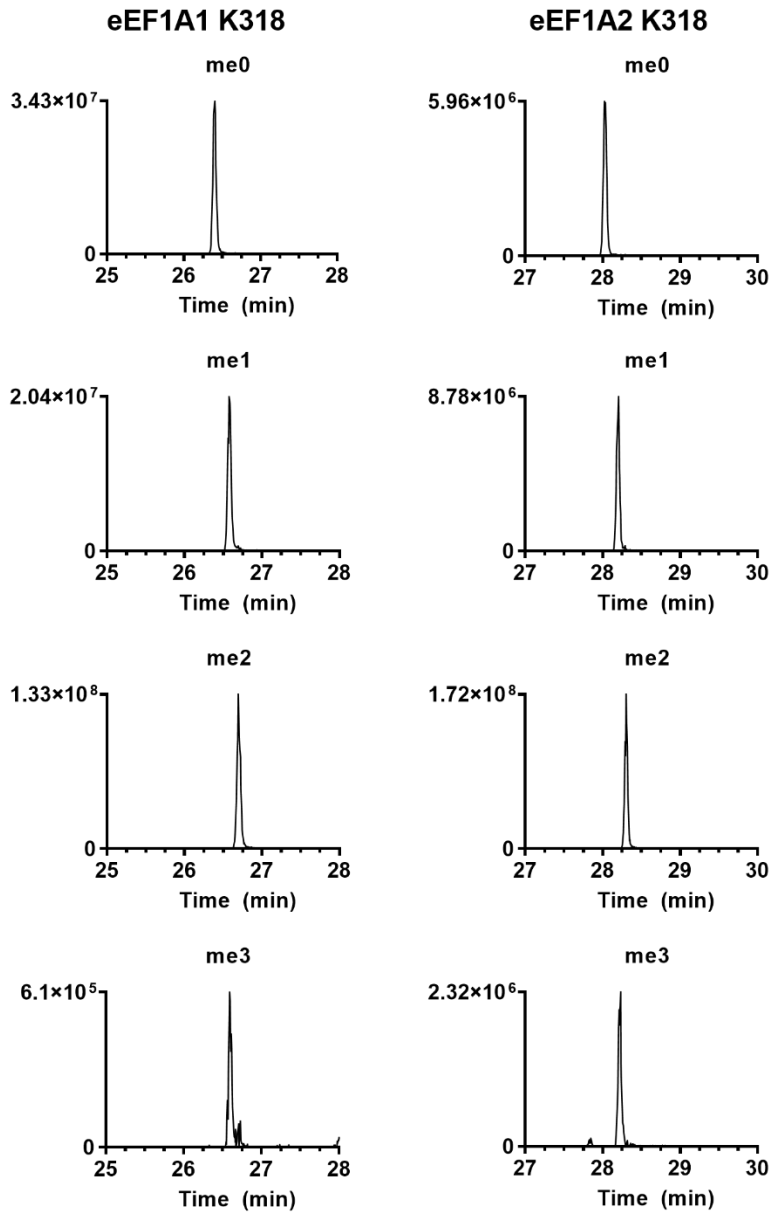

**Figure S19. Human eEF1A1 and eEF1A2 purified from WT yeast are methylated at K318.**

Data from Hamey et al. 2017 (PRIDE: PXD005497) were interrogated the presence of eEF1A K318 methylation. Specifically, raw files “Invitro\_Methylation\_assay\_eEF1A1\_negative\_trypsin.raw” (eEF1A1) or “Invitro\_Methylation\_assay\_eEF1A2\_negative\_trypsin.raw” (eEF1A2) were used. The K318 methylation status of eEF1A1 and eEF1A2 were measured by taking extracted ion chromatograms (XICs) of doubly-charged tryptic peptides NVSVKDVR (eEF1A1) or NVSVKDIR (eEF1A2) in all methylation states.

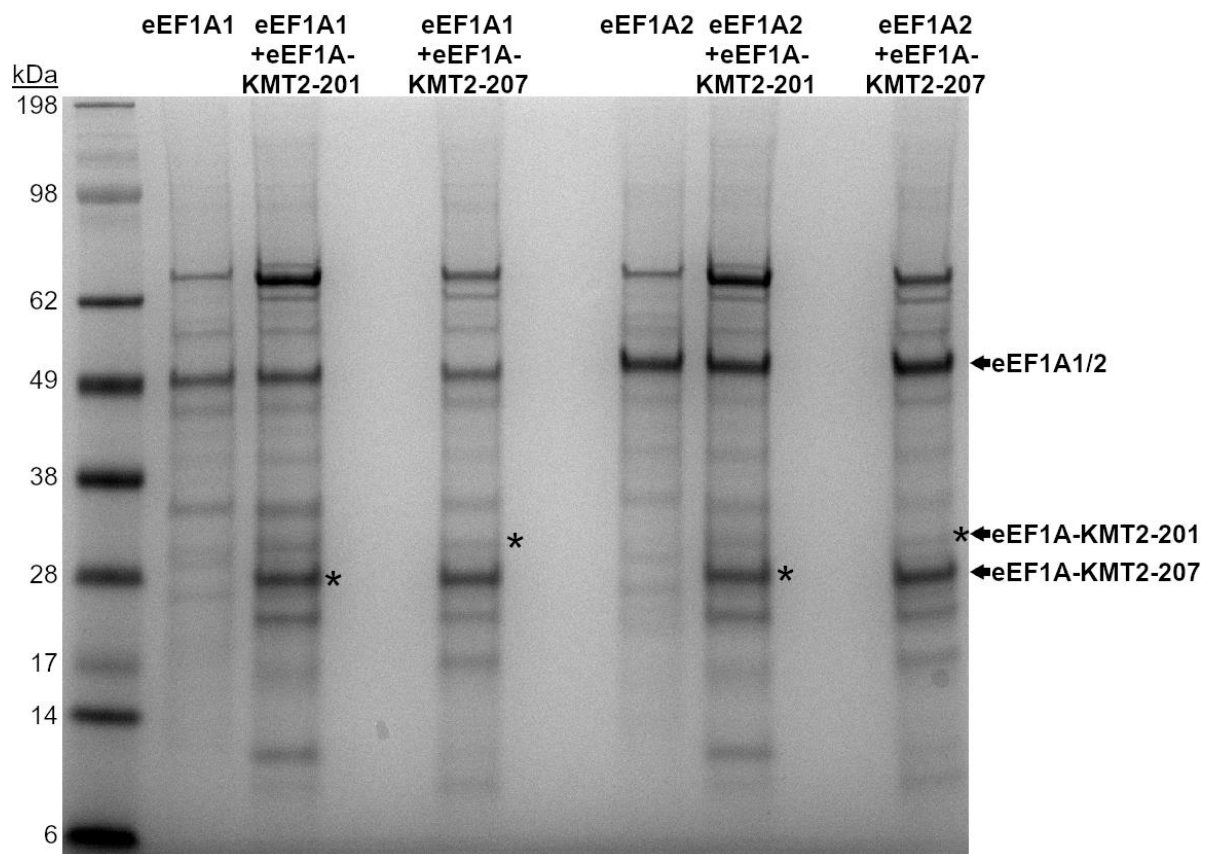

**Figure S20. Coomassie-stained SDS-PAGE gel of eEF1A-KMT2-201 and eEF1A-KMT2-207 methylation assays of eEF1A1 and eEF1A2.**

Purified eEF1A1 or eEF1A2 (2.2  $\mu$ M) were incubated without any enzyme or with eEF1A-KMT2-201 or eEF1A-KMT2-207 (3  $\mu$ M) in the presence of AdoMet for 18 h at 37  $^{\circ}$ C. Proteins were separated by SDS-PAGE and stained with Coomassie. eEF1A1 and eEF1A2 gel bands were then digested by AspN and analysed by LC-MS/MS (see Fig. 6B). For the eEF1A1 assay, bands corresponding to eEF1A-KMT2-201 and eEF1A-KMT2-207 were also excised, digested with trypsin and the presence of the enzymes verified by LC-MS/MS. eEF1A-KMT2-201 and eEF1A-KMT2-207 were high abundance in the analysed bands, being the top hit besides eEF1A in both cases. Asterisk (\*) indicates contaminating proteins from *E. coli*.

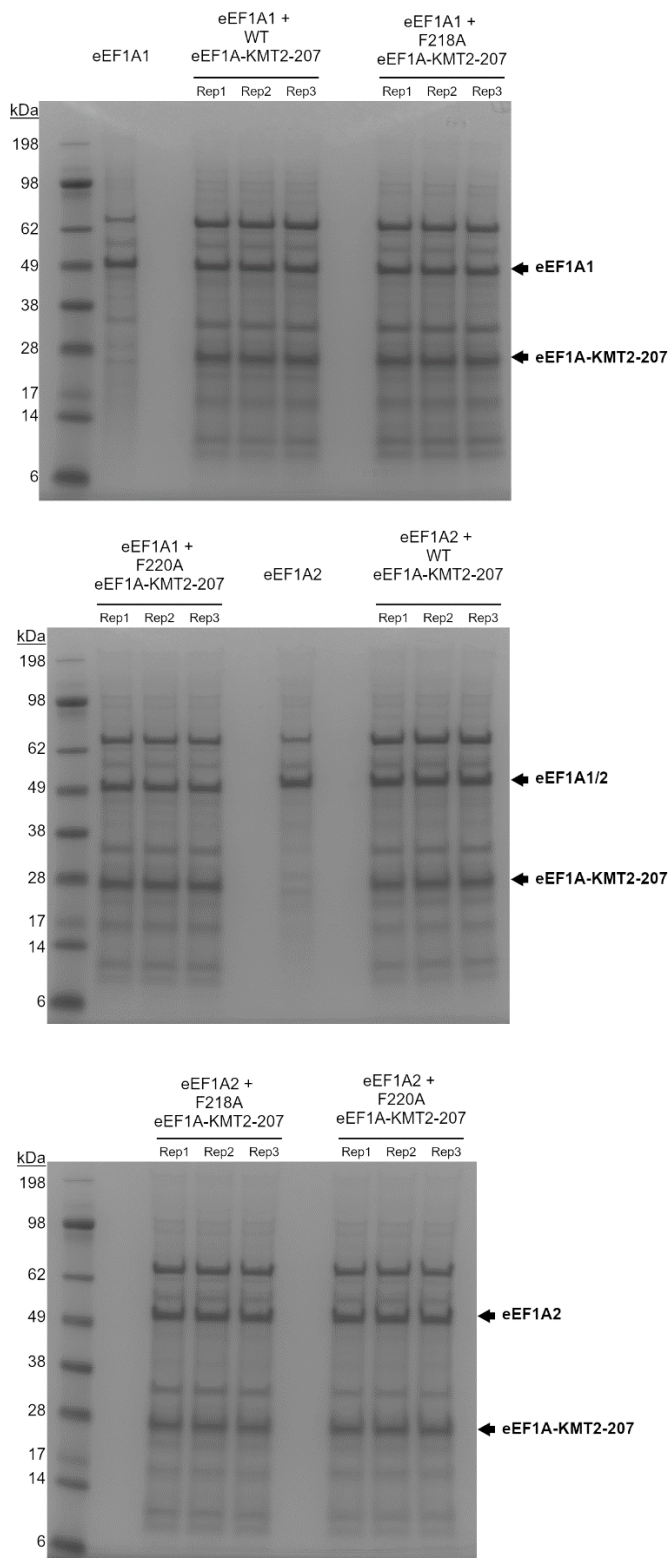

**Figure S21. Coomassie-stained SDS-PAGE gels of eEF1A-KMT2-207 F218A and F220A mutant assays.**

Purified WT and mutant eEF1A-KMT-207 (3  $\mu$ M) were incubated with eEF1A1 or eEF1A2 (both 2.2  $\mu$ M) in the presence of AdoMet for 2 h at 37  $^{\circ}$ C. Proteins were separated by SDS-PAGE and stained with Coomassie. eEF1A1/2 gel bands were then digested with AspN and the resulting eEF1A1/2 K318 methylation was detected by LC-MS/MS (see Fig. 7C, D).



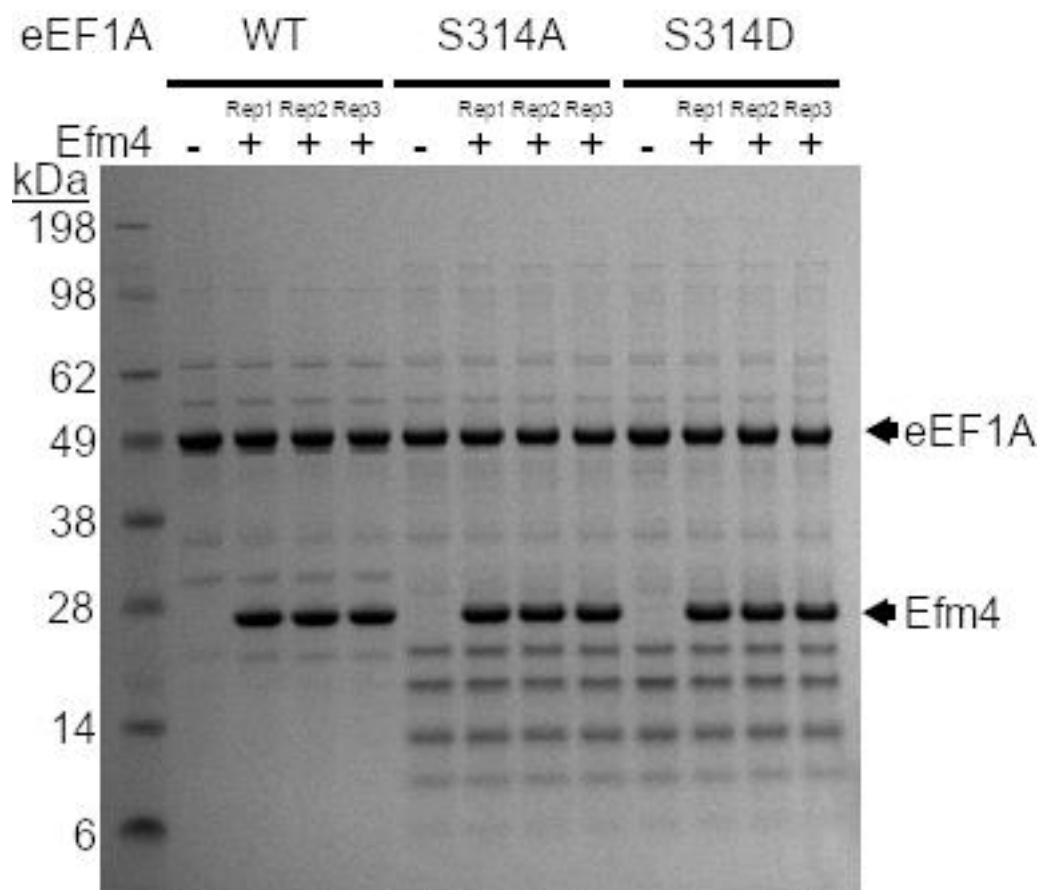

**Figure S22. Coomassie-stained SDS-PAGE gels of eEF1A phospho-mutant assays.**

Purified WT and mutant eEF1A (from  $\Delta$ EFM4) (2  $\mu$ M) were incubated with or without purified Efm4 (3  $\mu$ M) in the presence of AdoMet at 30 °C for 30 min. Proteins were separated by SDS-PAGE and stained with Coomassie. eEF1A gel bands were then digested with trypsin and the resulting K316 methylation was detected by LC-MS/MS (see Fig. 8C).



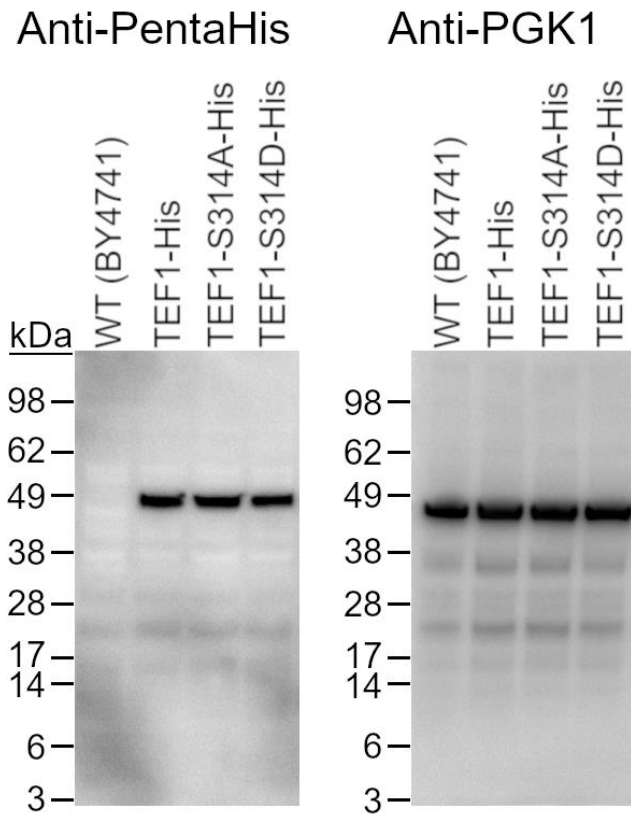

**Figure S23. PentaHis immunoblot confirms phospho-mutants have no effect on eEF1A protein levels.**

Levels of hexahistidine-tagged WT and S314-mutant eEF1A were detected in lysates from WT (BY4741), TEF1-His, TEF1-S314A-His and TEF1-S314D-His yeast strains via immunoblotting with an anti-Penta-His HRP antibody. The WT strain showed no signal, as expected, while WT hexahistidine-tagged eEF1A (from TEF1-His strain) showed similar levels to hexahistidine-tagged and S314A or S314D mutant eEF1A (from TEF1-S314A-His and TEF1-S314D-His strains). Lysates were also immunoblotted with an anti-PGK1 antibody as a loading control.

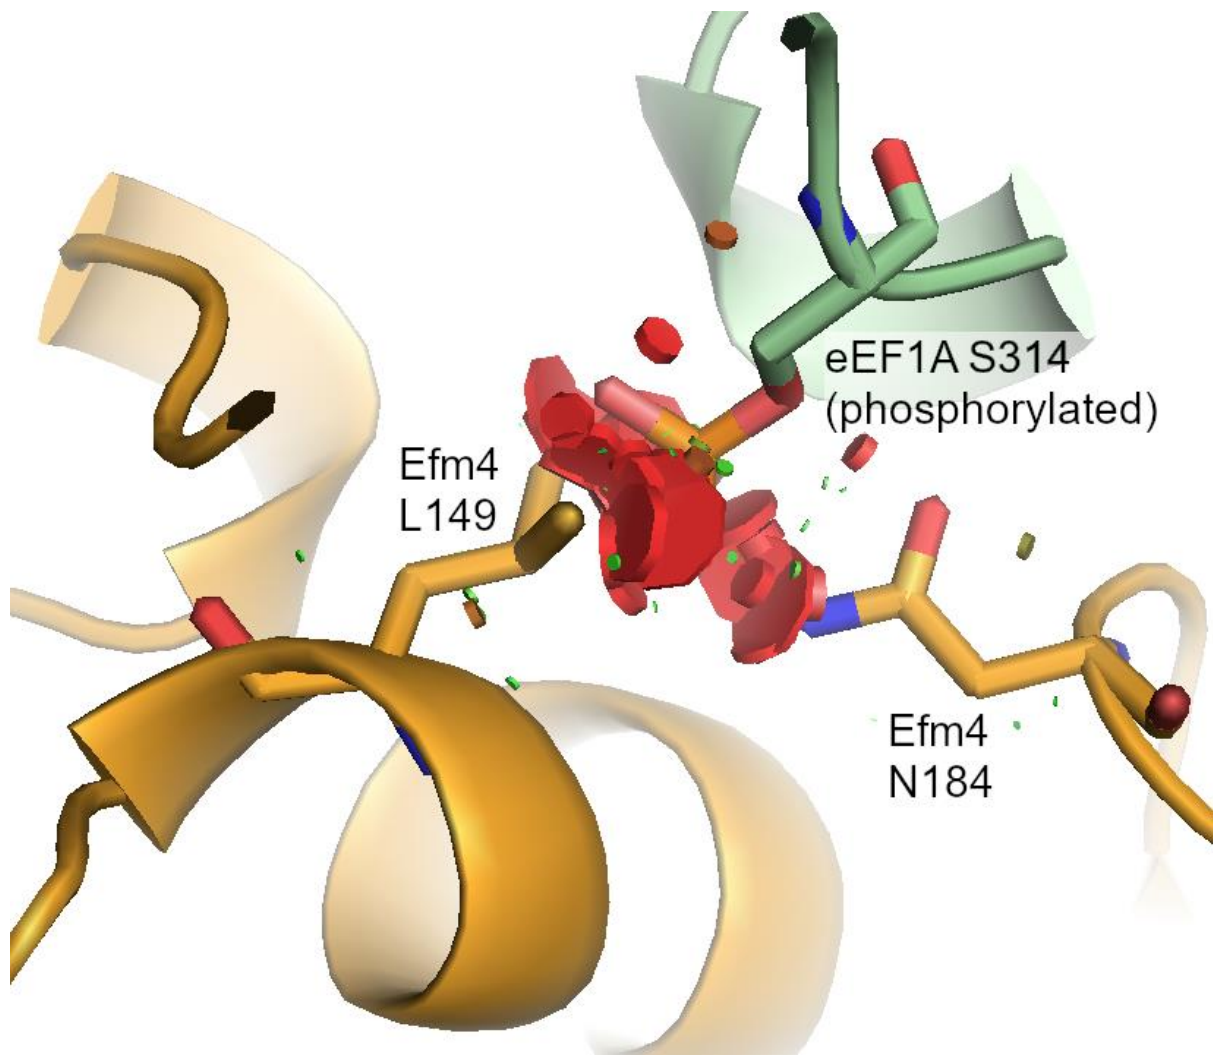

**Figure S24. Phosphorylated eEF1A S314 likely causes steric clashes with Efm4 L149 and N184.**

eEF1A S314 in the AlphaFold-Multimer model of Efm4:eEF1A (rank 1) was changed to a phospho-serine, and the resulting steric clashes with Efm4 are shown as red discs.
